# Supplementary material for: Profiling of Volatile Compounds in ‘Muscat Hamburg’ Contaminated with Aspergillus carbonarius before OTA Biosynthesis Based on HS-SPME-GC-MS and DLLME-GC-MS
Source: MDPI journal article supplement (doi:10.3390/molecules29030567), 2024-01-23
Supplement: s1 [file s1]

**Table S1.** Concentrations and RI of volatile compounds of samples from day 0, 1 and CK1 by HS-SPME-GC-MS.

| NO | Compound                       | RI   | Concentration ( $\mu\text{g/kg}$ ) |                    |                     |
|----|--------------------------------|------|------------------------------------|--------------------|---------------------|
|    |                                |      | 0d                                 | CK 1d              | 1d                  |
| 1  | hexanal                        | 1077 | 1304.6 $\pm$ 170.8                 | 903.1 $\pm$ 74.4   | 846.1 $\pm$ 181.7   |
| 2  | $\alpha$ -terpinene            | 1187 | 24.4 $\pm$ 3.2                     | 13.8 $\pm$ 5.3     | 36.1 $\pm$ 9.2      |
| 3  | <i>D</i> -limonene             | 1206 | 207.7 $\pm$ 16.4                   | 167.0 $\pm$ 16.8   | 318.4 $\pm$ 110.1   |
| 4  | $\beta$ -phellandrene          | 1218 | 44.6 $\pm$ 2.6                     | 21.5 $\pm$ 18.6    | 28.6 $\pm$ 15.3     |
| 5  | ( <i>E</i> )-2-hexenal         | 1228 | 882.6 $\pm$ 117.3                  | 633.2 $\pm$ 55.1   | 406.7 $\pm$ 91.0    |
| 6  | trans- $\beta$ -ocimene        | 1242 | 149.7 $\pm$ 12.2                   | 185.6 $\pm$ 4.5    | 166.2 $\pm$ 107.8   |
| 7  | cis- $\beta$ -ocimene          | 1259 | 270.2 $\pm$ 14.5                   | 219.3 $\pm$ 10.7   | 396.2 $\pm$ 112.4   |
| 8  | styrene                        | 1269 | 34.1 $\pm$ 1.6                     | 46.7 $\pm$ 5.6     | 38.1 $\pm$ 7.1      |
| 9  | <i>p</i> -cymene               | 1280 | 3.3 $\pm$ 2.8                      | 3.1 $\pm$ 2.7      | 4.1 $\pm$ 1.9       |
| 10 | terpinolene                    | 1287 | 61.8 $\pm$ 6.2                     | 44.2 $\pm$ 0.3     | 90.5 $\pm$ 27.8     |
| 11 | trans-2-(2-pentenyl)furan      | 1311 | 13.8 $\pm$ 2.4                     | 14.2 $\pm$ 3.5     | 27.8 $\pm$ 5.4      |
| 12 | 6-methyl-5-hepten-2-one        | 1345 | 34.6 $\pm$ 3.8                     | 26.0 $\pm$ 0.7     | 24.3 $\pm$ 1.3      |
| 13 | 1-hexanol                      | 1355 | 68.5 $\pm$ 6.5                     | 58.1 $\pm$ 5.3     | 72.0 $\pm$ 2.4      |
| 14 | trans-rose oxide               | 1359 | 65.6 $\pm$ 4.3                     | 60.3 $\pm$ 5.6     | 58.0 $\pm$ 13.8     |
| 15 | cis-rose oxide                 | 1377 | 18.0 $\pm$ 1.1                     | 19.1 $\pm$ 1.8     | 20.4 $\pm$ 6.6      |
| 16 | allo-ocimene                   | 1379 | 70.0 $\pm$ 4.4                     | 64.2 $\pm$ 6.7     | 106.0 $\pm$ 33.2    |
| 17 | ( <i>Z</i> )-3-hexen-1-ol      | 1388 | 4.1 $\pm$ 0.4                      | 3.8 $\pm$ 0.6      | 6.2 $\pm$ 4.6       |
| 18 | nonanal                        | 1402 | 45.4 $\pm$ 4.6                     | 36.5 $\pm$ 3.0     | 24.6 $\pm$ 7.9      |
| 19 | ( <i>Z</i> )-2-hexen-1-ol      | 1409 | 32.8 $\pm$ 1.3                     | 37.9 $\pm$ 1.3     | 41.1 $\pm$ 12.4     |
| 20 | ( <i>E,E</i> )-2,4-hexadienal  | 1416 | 9.2 $\pm$ 1.4                      | 6.8 $\pm$ 0.6      | 8.4 $\pm$ 6.2       |
| 21 | 4-ethyl-2-hexynal              | 1426 | 13.1 $\pm$ 0.9                     | 17.0 $\pm$ 1.0     | 23.9 $\pm$ 11.5     |
| 22 | perillen                       | 1430 | 6.1 $\pm$ 0.6                      | 12.5 $\pm$ 0.9     | 16.1 $\pm$ 8.2      |
| 23 | ( <i>E</i> )-2-octenal         | 1441 | 12.6 $\pm$ 0.5                     | 24.2 $\pm$ 0.8     | 17.8 $\pm$ 8.2      |
| 24 | linalool oxide (furanoid)      | 1450 | 65.9 $\pm$ 3.6                     | 56.1 $\pm$ 2.4     | 87.9 $\pm$ 30.8     |
| 25 | 1-octen-3-ol                   | 1453 | 7.3 $\pm$ 0.2                      | 15.2 $\pm$ 6.0     | 11.7 $\pm$ 2.6      |
| 26 | 6-methyl-5-hepten-2-ol         | 1465 | 31.8 $\pm$ 0.8                     | 45.0 $\pm$ 2.7     | 55.8 $\pm$ 6.0      |
| 27 | citronellal                    | 1489 | 2.1 $\pm$ 0.2                      | 5.4 $\pm$ 1.0      | 2.4 $\pm$ 0.5       |
| 28 | 2-ethyl-1-hexanol              | 1492 | 5.3 $\pm$ 0.3                      | 6.7 $\pm$ 0.8      | 7.0 $\pm$ 2.0       |
| 29 | ( <i>E,E</i> )-2,4-heptadienal | 1507 | 9.4 $\pm$ 0.7                      | 11.5 $\pm$ 0.9     | 10.0 $\pm$ 2.9      |
| 30 | benzaldehyde                   | 1543 | 5.8 $\pm$ 0.5                      | 9.1 $\pm$ 0.4      | 6.9 $\pm$ 1.2       |
| 31 | ( <i>E</i> )-2-nonenal         | 1547 | 12.1 $\pm$ 2.4                     | 19.0 $\pm$ 5.2     | 12.2 $\pm$ 2.6      |
| 32 | linalool                       | 1553 | 6719.5 $\pm$ 101.7                 | 5573.3 $\pm$ 409.8 | 8732.2 $\pm$ 2735.7 |
| 33 | 3,7-dimethyl-3,6-octadienal    | 1572 | 1.6 $\pm$ 0.2                      | 0.7 $\pm$ 0.6      | 3.0 $\pm$ 1.3       |
| 34 | ( <i>E,Z</i> )-2,6-nonadienal  | 1600 | 10.9 $\pm$ 2.5                     | 9.6 $\pm$ 2.8      | 6.5 $\pm$ 0.3       |
| 35 | hotrienol                      | 1615 | 21.4 $\pm$ 4.8                     | 13.7 $\pm$ 0.8     | 16.6 $\pm$ 6.4      |
| 36 | ( <i>E</i> )-2-octen-1-ol      | 1620 | 1.3 $\pm$ 1.1                      | 2.1 $\pm$ 1.2      | 0.8 $\pm$ 0.7       |
| 37 | decanoic acid ethyl ester      | 1644 | 7.2 $\pm$ 2.7                      | 7.9 $\pm$ 3.5      | 12.3 $\pm$ 6.4      |
| 38 | benzeneacetaldehyde            | 1665 | 31.3 $\pm$ 1.8                     | 33.2 $\pm$ 4.4     | 38.0 $\pm$ 4.3      |
| 39 | citronellyl acetate            | 1669 | 3.1 $\pm$ 0.3                      | 3.3 $\pm$ 0.6      | 2.1 $\pm$ 1.9       |

|    |                                   |      |                   |                   |                  |
|----|-----------------------------------|------|-------------------|-------------------|------------------|
| 40 | ( <i>E</i> )- $\beta$ -farnesene  | 1673 | 32.2 $\pm$ 9.5    | 29.0 $\pm$ 0.8    | 16.5 $\pm$ 4.6   |
| 41 | neral                             | 1696 | 20.0 $\pm$ 0.9    | 26.9 $\pm$ 2.5    | 38.5 $\pm$ 16.7  |
| 42 | $\alpha$ -terpineol               | 1706 | 174.6 $\pm$ 19.4  | 105.8 $\pm$ 3.6   | 84.4 $\pm$ 25.8  |
| 43 | $\alpha$ -cyclogeraniol           | 1714 | 6.6 $\pm$ 1.3     | 6.3 $\pm$ 1.2     | 8.1 $\pm$ 0.7    |
| 44 | trans-citral                      | 1746 | 39.9 $\pm$ 1.5    | 49.4 $\pm$ 1.5    | 61.9 $\pm$ 12.3  |
| 45 | trans-pyranoid linalool oxide     | 1748 | 41.3 $\pm$ 15.8   | 37.3 $\pm$ 1.1    | 17.6 $\pm$ 15.3  |
| 46 | $\alpha$ -citronellol             | 1762 | 4.6 $\pm$ 0.8     | 4.4 $\pm$ 0.5     | 4.1 $\pm$ 1.8    |
| 47 | geranyl acetate                   | 1765 | 1.4 $\pm$ 0.2     | 2.1 $\pm$ 0.2     | 3.0 $\pm$ 1.9    |
| 48 | $\beta$ -citronellol              | 1770 | 413.9 $\pm$ 4.9   | 324.0 $\pm$ 7.9   | 248.9 $\pm$ 67.2 |
| 49 | 7-methyl-3-methylene-6-octen-1-ol | 1793 | 28.9 $\pm$ 0.2    | 23.5 $\pm$ 1.1    | 18.0 $\pm$ 3.9   |
| 50 | nerol                             | 1807 | 543.4 $\pm$ 15.8  | 501.5 $\pm$ 31.5  | 505.2 $\pm$ 84.5 |
| 51 | isogeraniol                       | 1818 | 7.4 $\pm$ 0.2     | 7.1 $\pm$ 1.2     | 6.3 $\pm$ 1.8    |
| 52 | trans-geraniol                    | 1853 | 1076.2 $\pm$ 23.0 | 1026.7 $\pm$ 63.1 | 944.3 $\pm$ 99.0 |
| 53 | isopulegol                        | 1861 | 14.1 $\pm$ 4.5    | 12.4 $\pm$ 6.7    | 9.1 $\pm$ 3.3    |
| 54 | benzyl alcohol                    | 1881 | 4.8 $\pm$ 1.0     | 4.9 $\pm$ 0.6     | 4.7 $\pm$ 0.6    |
| 55 | phenylethyl alcohol               | 1931 | 4.9 $\pm$ 0.6     | 5.1 $\pm$ 0.5     | 7.2 $\pm$ 1.8    |
| 56 | nerolic acid                      | 2349 | 18.0 $\pm$ 0.7    | 50.8 $\pm$ 15.4   | 14.4 $\pm$ 2.3   |

a Values shown represent the averages of triplicate samples, results were expressed as the mean value  $\pm$  standard deviation (SD).

b Volatile compounds of grape samples from day 0, 1 and CK1 : namely 0d, 1d, CK1d.

**Table S2.** Concentrations and RI of volatile compounds of samples from day 0, 1 and CK1 by DLLME-GC-MS.

| NO | Compound                                         | RI   | Concentration ( $\mu$ g/kg) |                      |                     |
|----|--------------------------------------------------|------|-----------------------------|----------------------|---------------------|
|    |                                                  |      | 0 d                         | CK 1d                | 1 d                 |
| 57 | ethyl acetate                                    | 903  | 216.2 $\pm$ 18.8            | 222.2 $\pm$ 38.2     | 91.7 $\pm$ 17.2     |
| 58 | butyl acetate                                    | 1066 | 411.7 $\pm$ 22.4            | 456.5 $\pm$ 40.0     | 440.1 $\pm$ 28.9    |
| 59 | hexanal                                          | 1077 | 254.1 $\pm$ 30.7            | 131.7 $\pm$ 55.0     | 292.9 $\pm$ 46.6    |
| 60 | ( <i>E</i> )-2-hexenal                           | 1228 | 207.6 $\pm$ 25.1            | 186.0 $\pm$ 21.6     | 67.6 $\pm$ 42.1     |
| 61 | linalool                                         | 1553 | 1037.6 $\pm$ 27.4           | 1429.0 $\pm$ 133.9   | 2716.8 $\pm$ 549.2  |
| 62 | trans-pyranoid linalool oxide                    | 1748 | 277.9 $\pm$ 70.7            | 184.4 $\pm$ 26.8     | 230.6 $\pm$ 55.6    |
| 63 | $\beta$ -citronellol                             | 1770 | 196.2 $\pm$ 24.9            | 278.0 $\pm$ 22.8     | 205.7 $\pm$ 41.3    |
| 64 | nerol                                            | 1807 | 632.3 $\pm$ 73.8            | 1750.0 $\pm$ 141.6   | 947.6 $\pm$ 137.4   |
| 65 | trans-geraniol                                   | 1853 | 2089.5 $\pm$ 146.9          | 19995.9 $\pm$ 110.5  | 2258.4 $\pm$ 157.2  |
| 66 | benzyl alcohol                                   | 1881 | 51.6 $\pm$ 10.2             | 127.5 $\pm$ 32.4     | 86.5 $\pm$ 27.5     |
| 67 | phenylethyl alcohol                              | 1931 | 93.0 $\pm$ 31.2             | 174.4 $\pm$ 40.1     | 121.0 $\pm$ 0.6     |
| 68 | ( <i>E</i> )-2,6-dimethyl-3,7-octadiene-2,6-diol | 1938 | 121.3 $\pm$ 54.4            | 106.3 $\pm$ 28.8     | 198.3 $\pm$ 55.5    |
| 69 | 2,6-dimethyl-1,7-octadiene-3,6-diol              | 2104 | 87.5 $\pm$ 19.3             | 139.2 $\pm$ 89.0     | 135.2 $\pm$ 38.2    |
| 70 | 2,4-di-tert-butylphenol                          | 2326 | 7762.8 $\pm$ 860.3          | 12168.8 $\pm$ 4481.6 | 9891.0 $\pm$ 1692.9 |
| 71 | nerolic acid                                     | 2349 | 1518.4 $\pm$ 56.2           | 2864.3 $\pm$ 112.4   | 2697.0 $\pm$ 409.5  |

a Values shown represent the averages of triplicate samples, results were expressed as the mean value  $\pm$  standard deviation (SD).

b Volatile compounds of grape samples from day 0, 1 and CK1: namely 0d, 1d, CK1d.

| Table S3. Determination of OTA in grapes (n=5) |                      |                    |                    |           |
|------------------------------------------------|----------------------|--------------------|--------------------|-----------|
|                                                | Spiked level         | Grape              |                    |           |
|                                                | ( $\mu\text{g/kg}$ ) | Cabernet Gernischt | Cabernet Sauvignon | Red Globe |
| Recovery (%)                                   | 1.5                  | 82.61              | 106.88             | 107.92    |
|                                                | 15                   | 116.49             | 118.93             | 119.69    |
|                                                | 40                   | 105.94             | 109.48             | 110.58    |
| RSD (%)                                        | 1.5                  | 4.71               | 4.32               | 7.48      |
|                                                | 15                   | 4.35               | 3.07               | 3.96      |
|                                                | 40                   | 3.64               | 1.53               | 2.00      |

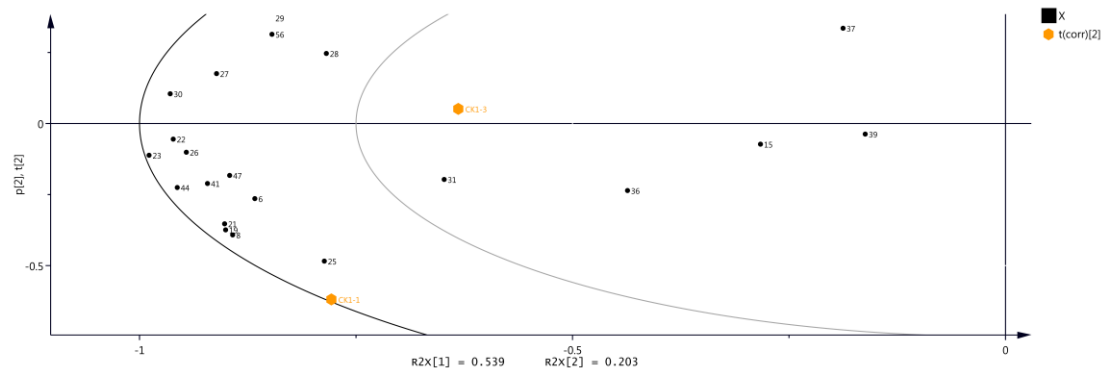

Figure S1. Supplementary figure for Figure 2.

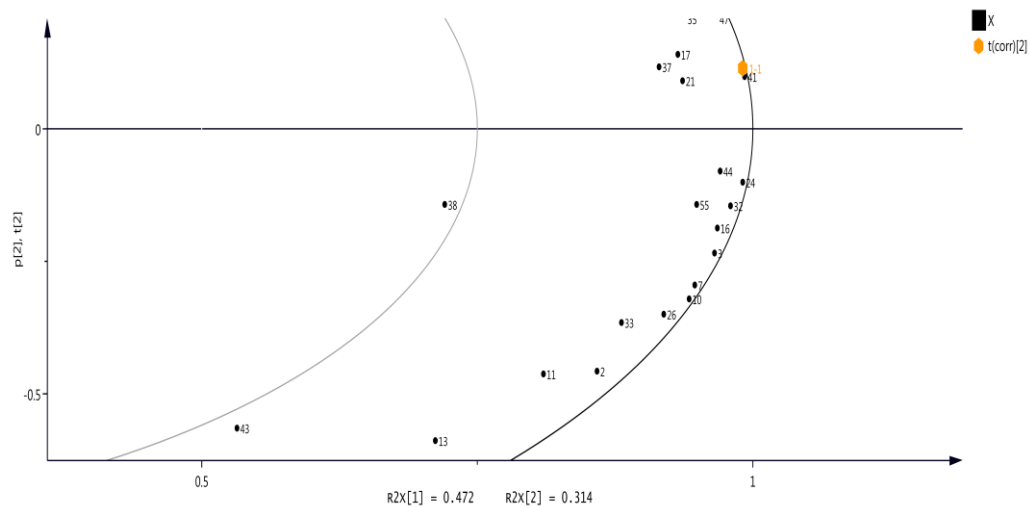

**Figure S2.** Supplementary figure for Figure 3.
